# Supplementary material for: Global Prevalence of Myopia and High Myopia and Temporal Trends from 2000 through 2050
Source: Elsevier journal article supplement (doi:10.1016/j.ophtha.2016.01.006), 2016-02-11
Supplement: mmc1 [file mmc1.pdf]

## Annex 1 Papers used in determining prevalences

- Aine, Esko. "Refractive Errors in a Finnish Rural Population." *Acta ophthalmologica* 62, no. 6 (1984): 944-954.
- Al-Rowaily, Mohammad A. "Prevalence of Refractive Errors among Pre-School Children at King Abdulaziz Medical City, Riyadh, Saudi Arabia." *Saudi Journal of Ophthalmology* 24, no. 2 (2010): 45-48.
- Al Wadaani, Fahd Abdullah, Tarek Tawfik Amin, Ayub Ali and Atuar Rahman Khan. "Prevalence and Pattern of Refractive Errors among Primary School Children in Al Hassa, Saudi Arabia." *Global journal of health science* 5, no. 1 (2012): p125.
- Anera, Rosario G, Margarita Soler, Juan De La Cruz Cardona, Carlos Salas and Carolina Ortiz. "Prevalence of Refractive Errors in School - Age Children in Morocco." *Clinical & experimental ophthalmology* 37, no. 2 (2009): 191-196.
- Antón, Alfonso, María T Andrada, Agustín Mayo, Javier Portela and Jesús Merayo. "Epidemiology of Refractive Errors in an Adult European Population: The Segovia Study." *Ophthalmic epidemiology* 16, no. 4 (2009): 231-237.
- Attebo, Karin, Rebecca Q Ivers and Paul Mitchell. "Refractive Errors in an Older Population: The Blue Mountains Eye Study<sup>11</sup>the Authors Have No Proprietary Interest in Any of the Materials Mentioned in This Study." *Ophthalmology* 106, no. 6 (1999): 1066-1072.
- Ayed, T, M Sokkah, O Charfi and L El Matri. "[Epidemiologic Study of Refractive Errors in Schoolchildren in Socioeconomically Deprived Regions in Tunisia]." *Journal français d'ophtalmologie* 25, no. 7 (2002): 712-717.
- Barnes, Shawn S, Pamela-Jaimelyn M Utu, Lauren Sumida, Darragh C O'Carroll, Tyrie L Jenkins and John Corboy. "Survey on Visual Impairment and Refractive Errors on Ta'u Island, American Samoa." *Journal of ophthalmic & vision research* 6, no. 1 (2011): 32.
- Bastawrous, A., W. Mathenge, A. Foster and H. Kuper. "Prevalence and Predictors of Refractive Error and Spectacle Coverage in Nakuru, Kenya: A Cross-Sectional, Population-Based Study." *Int Ophthalmol* 33, no. 5 (2013): 541-8.
- Bourne, RRA, BP Dineen, DM Noorul Huq, SM Ali and GJ Johnson. "Correction of Refractive Error in the Adult Population of Bangladesh: Meeting the Unmet Need." *Investigative Ophthalmology and Visual Science* 45, (2004): 410-417.
- Carter, M. J., V. C. Lansingh, G. Schacht, M. Rio del Amo, M. Scalamogna and T. D. France. "Visual Acuity and Refraction by Age for Children of Three Different Ethnic Groups in Paraguay." *Arg Bras Oftalmol* 76, no. 2 (2013): 94-7.
- Casson, Robert J, Shyalle Kahawita, Aimee Kong, James Muecke, Sipheththavong Sisaleumsak and Vithoune Visonnavong. "Exceptionally Low Prevalence of Refractive Error and Visual Impairment in Schoolchildren from Lao People's Democratic Republic." *Ophthalmology* 119, no. 10 (2012): 2021-2027.
- Cheng, Ching-Yu, Wen-Ming Hsu, Jorn-Hon Liu, Su-Ying Tsai and Pesus Chou. "Refractive Errors in an Elderly Chinese Population in Taiwan: The Shihpai Eye Study." *Investigative ophthalmology & visual science* 44, no. 11 (2003): 4630-4638.
- Congdon, N., Y. Wang, Y. Song, K. Choi, M. Zhang, Z. Zhou, Z. Xie, L. Li, X. Liu, A. Sharma, B. Wu and D. S. Lam. "Visual Disability, Visual Function, and Myopia among Rural Chinese Secondary

- School Children: The Xichang Pediatric Refractive Error Study (X-Pres)--Report 1." *Invest Ophthalmol Vis Sci* 49, no. 7 (2008): 2888-94.
- Cortinez, María Florencia, José Pablo Chiappe and Rafael Iribarren. "Prevalence of Refractive Errors in a Population of Office-Workers in Buenos Aires, Argentina." *Ophthalmic epidemiology* 15, no. 1 (2008): 10-16.
- Czepita, D, A Mojsa and M Zejmo. "Prevalence of Myopia and Hyperopia among Urban and Rural Schoolchildren in Poland." In *Annales Academiae Medicae Stetinensis*, 54, 17, 2008.
- Czepita, Damian, Maria Żejmo and Artur Mojsa. "Prevalence of Myopia and Hyperopia in a Population of Polish Schoolchildren." *Ophthalmic and Physiological Optics* 27, no. 1 (2007): 60-65.
- Dandona, R., L. Dandona, M. Srinivas, P. Sahare, S. Narsaiah, S. R. Munoz, G. P. Pokharel and L. B. Ellwein. "Refractive Error in Children in a Rural Population in India." *Invest Ophthalmol Vis Sci* 43, no. 3 (2002): 615-22.
- Dandona, Rakhi, Lalit Dandona, Thomas J. Naduvilath, Marmamula Srinivas, Catherine A. McCarty and Gullapalli N. Rao. "Refractive Errors in an Urban Population in Southern India: The Andhra Pradesh Eye Disease Study." *Investigative Ophthalmology & Visual Science* 40, no. 12 (1999): 2810-2818.
- Dandona, Rakhi, Lalit Dandona, Marmamula Srinivas, Pyda Giridhar, Catherine A McCarty and Gullapalli N Rao. "Population - Based Assessment of Refractive Error in India: The Andhra Pradesh Eye Disease Study." *Clinical & experimental ophthalmology* 30, no. 2 (2002): 84-93.
- Dayan, Yosefa Bar, Avi Levin, Yair Morad, Itamar Grotto, Rachel Ben-David, Avishai Goldberg, Erez Onn, Isaac Avni, Yehezkel Levi and Oren Gil Benyamini. "The Changing Prevalence of Myopia in Young Adults: A 13-Year Series of Population-Based Prevalence Surveys." *Investigative Ophthalmology & Visual Science* 46, no. 8 (2005): 2760-2765.
- Dirani, M., Y. H. Chan, G. Gazzard, D. M. Hornbeak, S. W. Leo, P. Selvaraj, B. Zhou, T. L. Young, P. Mitchell, R. Varma, T. Y. Wong and S. M. Saw. "Prevalence of Refractive Error in Singaporean Chinese Children: The Strabismus, Amblyopia, and Refractive Error in Young Singaporean Children (Stars) Study." *Invest Ophthalmol Vis Sci* 51, no. 3 (2010): 1348-55.
- Eze, B I, O Okoye, NA Hussain and CN Mba. "Population-Based Screening of Ophthalmic Disorders in a Cohort of Nigerian Army Personnel." *Journal of the Royal Army Medical Corps* 158, no. 4 (2012): 305-307.
- Ezelum, Christian, Hessom Razavi, Selvaraj Sivasubramaniam, Clare E Gilbert, Gudlavalleti VS Murthy, Gabriel Entekume and Tafida Abubakar. "Refractive Error in Nigerian Adults: Prevalence, Type, and Spectacle Coverage." *Investigative ophthalmology & visual science* 52, no. 8 (2011): 5449-5456.
- Fan, Dorothy S. P., Dennis S. C. Lam, Robert F. Lam, Joseph T. F. Lau, King S. Chong, Eva Y. Y. Cheung, Ricky Y. K. Lai and Sek-Jin Chew. "Prevalence, Incidence, and Progression of Myopia of School Children in Hong Kong." *Investigative Ophthalmology & Visual Science* 45, no. 4 (2004): 1071-1075.
- Ferraz, F. H., J. E. Corrente, P. Opromolla, C. R. Padovani and S. A. Schellini. "Refractive Errors in a Brazilian Population: Age and Sex Distribution." *Ophthalmic Physiol Opt* 35, no. 1 (2015): 19-27.

- Fotouhi, Akbar, Hassan Hashemi, Mehdi Khabazkhoob and Kazem Mohammad. "The Prevalence of Refractive Errors among Schoolchildren in Dezful, Iran." *British journal of ophthalmology* 91, no. 3 (2007): 287-292.
- French, A. N., I. G. Morgan, G. Burlutsky, P. Mitchell and K. A. Rose. "Prevalence and 5- to 6-Year Incidence and Progression of Myopia and Hyperopia in Australian Schoolchildren." *Ophthalmology* 120, no. 7 (2013): 1482-91.
- Gao, Zoe, Ngy Meng, James Muecke, Weng Onn Chan, Horm Piseth, Aimee Kong, Theresa Jnguyenphamhh, Yalda Dehghan, Dinesh Selva, Robert Casson and Kim Ang. "Refractive Error in School Children in an Urban and Rural Setting in Cambodia." *Ophthalmic Epidemiology* 19, no. 1 (2012): 16-22.
- Garcia, Carlos Alexandre de Amorim, Fernando Oréfica, Gabrielle Fernandes Dutra Nobre, Dilene de Brito Souza, Marta Liliane Ramalho Rocha and Raul Navarro Garrido Vianna. "Prevalence of Refractive Errors in Students in Northeastern Brazil." *Arquivos brasileiros de oftalmologia* 68, no. 3 (2005): 321-325.
- Garner, LF, RF Kinnear, M McKellar, J Klinger, MS Hovander and T Grosvenor. "Refraction and Its Components in Melanesian Schoolchildren in Vanuatu." *American journal of optometry and physiological optics* 65, no. 3 (1988): 182-189.
- Goh, P. P., Y. Abqariyah, G. P. Pokharel and L. B. Ellwein. "Refractive Error and Visual Impairment in School-Age Children in Gombak District, Malaysia." *Ophthalmology* 112, no. 4 (2005): 678-85.
- Goh, Winnie SH and Carly SY Lam. "Changes in Refractive Trends and Optical Components of Hong Kong Chinese Aged 19–39 Years." *Ophthalmic and Physiological Optics* 14, no. 4 (1994): 378-382.
- Gordon, A. Refractive error in a Puerto Rican rural population. *Journal of the American Optometric Association* 61, 870-874 (1990).
- Grönlund, Marita Andersson, Susann Andersson, Eva Aring, Anna - Lena Hård and Ann Hellström. "Ophthalmological Findings in a Sample of Swedish Children Aged 4-15 Years." *Acta Ophthalmologica Scandinavica* 84, no. 2 (2006): 169-176.
- Guo, K., D. Y. Yang, Y. Wang, X. R. Yang, X. X. Jing, Y. Y. Guo, D. Zhu, Q. S. You, Y. Tao and J. B. Jonas. "Prevalence of Myopia in School Children in Ejina. The Gobi Desert Children Eye Study." *Invest Ophthalmol Vis Sci*, (2015).
- Gupta, A., R. J. Casson, H. S. Newland, J. Muecke, J. Landers, D. Selva and T. Aung. "Prevalence of Refractive Error in Rural Myanmar: The Meiktila Eye Study." *Ophthalmology* 115, no. 1 (2008): 26-32.e2.
- Hashemi, H., F. Rezvan, A. Beiranvand, O. A. Papi, H. Hoseini Yazdi, H. Ostadimoghaddam, A. A. Yekta, R. Norouzirad and M. Khabazkhoob. "Prevalence of Refractive Errors among High School Students in Western Iran." *J Ophthalmic Vis Res* 9, no. 2 (2014): 232-9.
- Hashemi, Hassan, Akbar Fotouhi and Kazem Mohammad. "The Age-and Gender-Specific Prevalences of Refractive Errors in Tehran: The Tehran Eye Study." *Ophthalmic epidemiology* 11, no. 3 (2004): 213-225.
- Hashemi, Hassan, Mehdi Khabazkhoob, Ebrahim Jafarzadehpur, Abbas Ali Yekta, Mohammad Hassan Emamian, Mohammad Shariati and Akbar Fotouhi. "High Prevalence of Myopia in an Adult Population, Shahroud, Iran." *Optometry & Vision Science* 89, no. 7 (2012): 993-999  
10.1097/OPX.0b013e31825e6554.

- Hashemi, Hassan, Farhad Rezvan, Hadi Ostadimoghaddam, Majid Abdollahi, Maryam Hashemi and Mehdi Khabazkhoob. "High Prevalence of Refractive Errors in a Rural Population: 'Nooravaran Salamat' mobile Eye Clinic Experience." *Clinical & experimental ophthalmology* 41, no. 7 (2013): 635-643.
- He, Mingguang, Wenyong Huang, Yuetao Li, Yingfeng Zheng, Qiuxia Yin and Paul J Foster. "Refractive Error and Biometry in Older Chinese Adults: The Liwan Eye Study." *Investigative ophthalmology & visual science* 50, no. 11 (2009): 5130-5136.
- He, Mingguang, Wenyong Huang, Yingfeng Zheng, Li Huang and Leon B. Ellwein. "Refractive Error and Visual Impairment in School Children in Rural Southern China." *Ophthalmology* 114, no. 2 (2007): 374-382.e1.
- He, Mingguang, Junwen Zeng, Yizhi Liu, Jingjing Xu, Gopal P Pokharel and Leon B Ellwein. "Refractive Error and Visual Impairment in Urban Children in Southern China." *Investigative Ophthalmology and Vision Science* 45, no. 3 (2004): 793-799.
- Hendricks, Theo JW, John De Brabander, Marlou HP Vankan - Hendricks, Frans G Van Der Horst, Fred Hendrikse and J Andre Knottnerus. "Prevalence of Habitual Refractive Errors and Anisometropia among Dutch Schoolchildren and Hospital Employees." *Acta ophthalmologica* 87, no. 5 (2009): 538-543.
- Ip, J. M., Rose, K. A., Morgan, I. G., Burlutsky, G. & Mitchell, P. Myopia and the urban environment: findings in a sample of 12-year-old Australian school children. *Investigative ophthalmology & visual science* 49, 3858-3863, doi:10.1167/iovs.07-1451 (2008).
- Jacobsen, Nina, Hanne Jensen and Ernst Goldschmidt. "Prevalence of Myopia in Danish Conscripts." *Acta Ophthalmologica Scandinavica* 85, no. 2 (2007): 165-170.
- Jamali, Payman, Akbar Fotouhi, Hassan Hashemi, Masud Younesian and Alireza Jafari. "Refractive Errors and Amblyopia in Children Entering School: Shahrood, Iran." *Optometry & Vision Science* 86, no. 4 (2009): 364-369.
- Jiménez, José Ramón, Javier Bermúdez, Manuel Rubiño, Luis Gómez and Rosario González Anera. "Prevalence of Myopia in an Adult Population of Two Different Ethnic Groups in the Ecuadorian Amazon." *Japanese journal of ophthalmology* 48, no. 2 (2004): 163-165.
- Jiménez, Raimundo, Margarita Soler, Rosario G Anera, José J Castro, M Angustias Pérez and Carlos Salas. "Ametropias in School-Age Children in Fada N' Gourma (Burkina Faso, Africa)." *Optometry & Vision Science* 89, no. 1 (2012): 33-37.
- Jobke, Sandra, Erich Kasten and Christian Vorwerk. "The Prevalence Rates of Refractive Errors among Children, Adolescents, and Adults in Germany." *Clinical ophthalmology (Auckland, NZ)* 2, no. 3 (2008): 601.
- Jung, Su-Kyung, Jin Hae Lee, Hirohiko Kakizaki and Donghyun Jee. "Prevalence of Myopia and Its Association with Body Stature and Educational Level in 19-Year-Old Male Conscripts in Seoul, South Korea." *Investigative Ophthalmology & Visual Science* 53, no. 9 (2012): 5579-5583.
- Katz, J., Tielsch, J. M. & Sommer, A. Prevalence and risk factors for refractive errors in an adult inner city population. *Investigative ophthalmology & visual science* 38, 334-340 (1997).
- Kawuma, Medi and Robert Mayeku. "A Survey of the Prevalence of Refractive Errors among Children in Lower Primary Schools in Kampala District." *African health sciences* 2, no. 2 (2002): 69-72.

- Kedir, J. and A. Girma. "Prevalence of Refractive Error and Visual Impairment among Rural School-Age Children of Goro District, Gurage Zone, Ethiopia." *Ethiop J Health Sci* 24, no. 4 (2014): 353-8.
- Kessel, Line, Jesper Leth Hougaard, Claus Mortensen, Torben Jørgensen, Henrik Lund - Andersen and Michael Larsen. "Visual Acuity and Refractive Errors in a Suburban Danish Population: Inter99 Eye Study." *Acta ophthalmologica Scandinavica* 82, no. 1 (2004): 19-24.
- Khader, YS, WQ Batayha, SMI Abdul-Aziz and MI Al-Shiekh-Khalil. "Prevalence and Risk Indicators of Myopia among Schoolchildren in Amman, Jordan." *Eastern Mediterranean health journal* 12, no. 3/4 (2006): 434.
- Kim, E. C., I. G. Morgan, H. Kakizaki, S. Kang and D. Jee. "Prevalence and Risk Factors for Refractive Errors: Korean National Health and Nutrition Examination Survey 2008-2011." *PLoS One* 8, no. 11 (2013): e80361.
- Kleinstejn, R. *et al.* Refractive Error and Ethnicity in Children. *Archives of Ophthalmology* 121, 1141-1147 (2003).
- Koh, Victor, Adeline Yang, Seang Mei Saw, Yiong Huak Chan, Sheng Tong Lin, Mellisa Mei Hui Tan, Frederick Tey, Gerard Nah and M. Kamran Ikram. "Differences in Prevalence of Refractive Errors in Young Asian Males in Singapore between 1996–1997 and 2009–2010." *Ophthalmic Epidemiology* 0, no. 0 (2014): 1-9.
- Krishnaiah, Sannapaneni, Marmamula Srinivas, Rohit C Khanna and Gullapalli N. Rao. "Prevalence and Risk Factors for Refractive Errors in the South Indian Adult Population: The Andhra Pradesh Eye Disease Study." *Clinical Ophthalmology* 3, (2009): 17-27.
- Lam, C. S., C. H. Lam, S. C. Cheng and L. Y. Chan. "Prevalence of Myopia among Hong Kong Chinese Schoolchildren: Changes over Two Decades." *Ophthalmic Physiol Opt* 32, no. 1 (2012): 17-24.
- Lam, Carly SY, Winnie SH Goh, YK Tang, KK Tsui, WC Wong and TC Man. "Changes in Refractive Trends and Optical Components of Hong Kong Chinese Aged over 40 Years." *Ophthalmic and Physiological Optics* 14, no. 4 (1994): 383-388.
- Lan, W., F. Zhao, L. Lin, Z. Li, J. Zeng, Z. Yang and I. G. Morgan. "Refractive Errors in 3-6 Year-Old Chinese Children: A Very Low Prevalence of Myopia?" *PLoS One* 8, no. 10 (2013): e78003.
- Laviers, H. R., Omar, F., Jecha, H., Kassim, G. & Gilbert, C. Presbyopic Spectacle Coverage, Willingness to Pay for Near Correction, and the Impact of Correcting Uncorrected Presbyopia in Adults in Zanzibar, East Africa. *Invest. Ophthalmol. Vis. Sci.* 51, 1234-1241, doi:10.1167/iops.08-3154 (2010).
- Lee, Jin Hae, Donghyun Jee, Jin-Woo Kwon and Won Ki Lee. "Prevalence and Risk Factors for Myopia in a Rural Korean Population." *Investigative Ophthalmology & Visual Science* 54, no. 8 (2013): 5466-5471.
- Lewallen, Susan, Rosemary Lowdon, Paul Courtright and Garrett L. Mehl. "A Population-Based Survey of the Prevalence of Refractive Error in Malawi." *Ophthalmic Epidemiology* 2, no. 3 (1995): 145-149.
- Li, Zhijian, Dianjun Sun, Hao Cuj, Liqiong Zhang, Ping Lju, Hongbin Yang and Jie Baj. "Refractive Error among the Elderly in Rural Southern Harbin, China." *Ophthalmic Epidemiology* 16, no. 6 (2009): 388-394.
- Li, Zhijian, Keke Xu, Shubin Wu, Jia Lv, Di Jin, Zhen Song, Zhongliang Wang and Ping Liu. "Population - Based Survey of Refractive Error among School - Aged Children in Rural

- Northern China: The Heilongjiang Eye Study." *Clinical & Experimental Ophthalmology*, (2013).
- Lim, Hyung Taek, Jin Sook Yoon, Seung-Sik Hwang and Sang Yeul Lee. "Prevalence and Associated Sociodemographic Factors of Myopia in Korean Children: The 2005 Third Korea National Health and Nutrition Examination Survey (Knhanes Iii)." *Japanese journal of ophthalmology* 56, no. 1 (2012): 76-81.
- Lin, L. L., Y. F. Shih, C. K. Hsiao and C. J. Chen. "Prevalence of Myopia in Taiwanese Schoolchildren: 1983 to 2000." *Ann Acad Med Singapore* 33, no. 1 (2004): 27-33.
- Lithander, Joan. "Prevalence of Myopia in School Children in the Sultanate of Oman, a Nation - Wide Study of 6292 Randomly Selected Children." *Acta Ophthalmologica Scandinavica* 77, no. 3 (1999): 306-309.
- Logan, Nicola S, Leon N Davies, Edward AH Mallen and Bernard Gilmartin. "Ametropia and Ocular Biometry in a Uk University Student Population." *Optometry & Vision Science* 82, no. 4 (2005): 261-266.
- Logan, Nicola S., Parth Shah, Alicja R. Rudnicka, Bernard Gilmartin and Christopher G. Owen. "Childhood Ethnic Differences in Ametropia and Ocular Biometry: The Aston Eye Study." *Ophthalmic and Physiological Optics* 31, no. 5 (2011): 550-558.
- Lv, Lei and Zhenghou Zhang. "Pattern of Myopia Progression in Chinese Medical Students: A Two-Year Follow-up Study." *Graefe's Archive for Clinical and Experimental Ophthalmology* 251, no. 1 (2013): 163-168.
- Mallen, Edward AH, Yazan Gammoh, Muawyah Al - Bdour and Fouad N Sayegh. "Refractive Error and Ocular Biometry in Jordanian Adults." *Ophthalmic and Physiological Optics* 25, no. 4 (2005): 302-309.
- Mamatkhuzhaeva, GN. "[Prevalence of Refractive Anomalies among School Children]." *Vestnik oftalmologii* 118, no. 1 (2001): 47-49.
- Mäntyjärvi, MI. "Predicting of Myopia Progression in School Children." *Journal of pediatric ophthalmology and strabismus* 22, no. 2 (1984): 71-75.
- Matsumura, Hiroomi and Hiroaki Hirai. "Prevalence of Myopia and Refractive Changes in Students from 3 to 17 Years of Age." *Survey of ophthalmology* 44, (1999): S109-S115.
- Maul, Eugenio, Silviana Barroso, Sergio R. Munoz, Robert D. Sperduto and Leon B. Ellwein. "Refractive Error Study in Children: Results from La Florida, Chile." *American Journal of Ophthalmology* 129, no. 4 (2000): 445-454.
- Mavracanas, Thomas A., Achilleas Mandalos, Dimitrios Peios, Vasilios Golias, Katherine Megalou, Anthoula Gregoriadou, Kyriaki Delidou and Basil Katsougiannopoulos. "Prevalence of Myopia in a Sample of Greek Students." *Acta Ophthalmologica Scandinavica* 78, no. 6 (2000): 656-659.
- McCarty, C. A., Livingston, P. M. & Taylor, H. R. Prevalence of myopia in adults: implications for refractive surgeons. *Journal of refractive surgery (Thorofare, NJ: 1995)* **13**, 229-234 (1996).
- Mehari, Zelalem Addisu and Abdirahman Wollie Yimer. "Prevalence of Refractive Errors among Schoolchildren in Rural Central Ethiopia." *Clinical and Experimental Optometry* 96, no. 1 (2013): 65-69.

- Midelfart, Anna, Bettina Kinge, Sven Midelfart and Stian Lydersen. "Prevalence of Refractive Errors in Young and Middle - Aged Adults in Norway." *Acta Ophthalmologica Scandinavica* 80, no. 5 (2002): 501-505.
- Montés-Micó, R. & Ferrer-Blasco, T. Distribution of refractive errors in Spain. *Doc Ophthalmol* 101, 25-33 (2000).
- Moraes Ibrahim, F., M. Moraes Ibrahim, J. R. Pompeo de Camargo, L. Veronese Rodrigues Mde, I. U. Scott and J. Silva Paula. "Visual Impairment and Myopia in Brazilian Children: A Population-Based Study." *Optom Vis Sci* 90, no. 3 (2013): 223-7.
- Morgan, Andrew, Richard Young, Battseren Narankhand, Stephanie Chen, Charles Cottriall and Sarah Hosking. "Prevalence Rate of Myopia in Schoolchildren in Rural Mongolia." *Optometry & Vision Science* 83, no. 1 (2006): 53-56 10.1097/01.opx.0000195567.88641.af.
- Murthy, GVS, SK Gupta, LB Ellwein, SR Munoz, GP Pokharel, L Sanga and D Bachani. "Refractive Error in Children in an Urban Population in New Delhi." *Investigative Ophthalmology and Visual Science* 43, no. 3 (2002): 623-631.
- Naidoo, KS, A Raghunandan, KP Mashige, P Govender, BA Holden, GP Pokharel and LB Ellwein. "Refractive Error and Visual Impairment in African Children in South Africa." *Investigative Ophthalmology and Visual Science* 44, no. 9 (2003): 3764-3770.
- Nangia, Vinay, Jost B Jonas, Ajit Sinha, Arshia Matin and Maithili Kulkarni. "Refractive Error in Central India: The Central India Eye and Medical Study." *Ophthalmology* 117, no. 4 (2010): 693-699.
- Ntim-Amponsah, CT and S Ofosu-Amaah. "Prevalence of Refractive Error and Other Eye Diseases in Schoolchildren in the Greater Accra Region of Ghana." *Journal of pediatric ophthalmology and strabismus* 44, no. 5 (2006): 294-297.
- O'Donoghue, L., J. F. McClelland, N. S. Logan, A. R. Rudnicka, C. G. Owen and K. J. Saunders. "Refractive Error and Visual Impairment in School Children in Northern Ireland." *Br J Ophthalmol* 94, no. 9 (2010): 1155-9.
- Ojaimi, Elvis, Kathryn A. Rose, Ian G. Morgan, Wayne Smith, Frank J. Martin, Annette Kifley, Dana Robaei and Paul Mitchell. "Distribution of Ocular Biometric Parameters and Refraction in a Population-Based Study of Australian Children." *Investigative Ophthalmology & Visual Science* 46, no. 8 (2005): 2748-2754.
- Ostadimoghaddam, Hadi, Akbar Fotouhi, Hassan Hashemi, Abbasali Yekta, Javad Heravian, Farhad Rezvan, Hamidreza Ghadimi, Bijan Rezvan and Mehdi Khabazkhoob. "Prevalence of the Refractive Errors by Age and Gender: The Mashhad Eye Study of Iran." *Clinical & experimental ophthalmology* 39, no. 8 (2011): 743-751.
- Pan, C. W., Y. F. Zheng, A. R. Anuar, M. Chew, G. Gazzard, T. Aung, C. Y. Cheng, T. Y. Wong and S. M. Saw. "Prevalence of Refractive Errors in a Multiethnic Asian Population: The Singapore Epidemiology of Eye Disease Study." *Invest Ophthalmol Vis Sci* 54, no. 4 (2013): 2590-8.
- Paudel, P., P. Ramson, T. Naduvilath, D. Wilson, H. T. Phuong, S. M. Ho and N. V. Giap. "Prevalence of Vision Impairment and Refractive Error in School Children in Ba Ria - Vung Tau Province, Vietnam." *Clin Experiment Ophthalmol*, (2013).
- Pi, L. H., L. Chen, Q. Liu, N. Ke, J. Fang, S. Zhang, J. Xiao, W. J. Ye, Y. Xiong, H. Shi, X. Y. Zhou and Z. Q. Yin. "Prevalence of Eye Diseases and Causes of Visual Impairment in School-Aged Children in Western China." *J Epidemiol* 22, no. 1 (2012): 37-44.

- Plainis, Sotiris, Joanna Moschandreas, Panagoula Nikolitsa, Eleani Plevridi, Trisevgeni Giannakopoulou, Vania Vitanova, Paraskevi Tzatzala, Ioannis G Pallikaris and Miltiadis K Tsilimbaris. "Myopia and Visual Acuity Impairment: A Comparative Study of Greek and Bulgarian School Children." *Ophthalmic and Physiological Optics* 29, no. 3 (2009): 312-320.
- Pokharel, A, PK Pokharel, H Das and S Adhikari. "The Patterns of Refractive Errors among the School Children of Rural and Urban Settings in Nepal." *Nepalese Journal of Ophthalmology* 2, no. 2 (2010): 114-120.
- Pokharel, Gopal P., A. Dominique Negrel, Sergio R. Munoz and Leon B. Ellwein. "Refractive Error Study in Children: Results from Mechi Zone, Nepal." *American Journal of Ophthalmology* 129, no. 4 (2000): 436-444.
- Prema, Raju, Ronnie George, Ramesh Sathyamangalam Ve, Arvind Hemamalini, Mani Baskaran, Govindaswamy Kumaramanickavel, McCarty Catherine and Lingam Vijaya. "Comparison of Refractive Errors and Factors Associated with Spectacle Use in a Rural and Urban South Indian Population.(Community Eye Care)." *Indian Journal of Ophthalmology* 56, no. 2 (2008): 139.
- Quek, Timothy P. L., Choon Guan Chua, Choon Seng Chong, Jin Ho Chong, Hwee Weng Hey, June Lee, Yee Fei Lim and Seang-Mei Saw. "Prevalence of Refractive Errors in Teenage High School Students in Singapore." *Ophthalmic and Physiological Optics* 24, no. 1 (2004): 47-55.
- Raju, Prema, S Ve Ramesh, Hemamalini Arvind, Ronnie George, Mani Baskaran, Pradeep G Paul, Govindasamy Kumaramanickavel, Catherine McCarty and Lingam Vijaya. "Prevalence of Refractive Errors in a Rural South Indian Population." *Investigative ophthalmology & visual science* 45, no. 12 (2004): 4268-4272.
- Rezvan, Farhad, Mehdi Khabazkhoob, Akbar Fotouhi, Hassan Hashemi, Hadi Ostadimoghaddam, Javad Heravian, Elham Azizi, Abbas Azimi Khorasani and Abbas Ali Yekta. "Prevalence of Refractive Errors among School Children in Northeastern Iran." *Ophthalmic and Physiological Optics* 32, no. 1 (2012): 25-30.
- Rifaat, R and SL Kivelä. "Visual Acuity and Refractive Errors in the Elderly in Nursing Homes." *Zeitschrift Fur Gerontologie* 22, no. 6 (1988): 315-320.
- Robinson, Barbara E. "Factors Associated with the Prevalence of Myopia in 6-Year-Olds." *Optometry & Vision Science* 76, no. 5 (1999): 266-271.
- Rodríguez-Abrego, G and HM Sotelo-Duenas. "Myopia Prevalence among School-Age Children in a Suburban Population." *Revista Med Instit Mex Seg Social* 47, (2009): 39-44.
- Rodriguez, N. M. and A. F. Romero. "The Prevalence of Refractive Conditions in Puerto Rican Adults Attending an Eye Clinic System." *J Optom* 7, no. 3 (2014): 161-7.
- Rushood, AA, S Azmat, M Shariq, A Khamis, KA Lakho, MZ Jadoon, N Sial and EA Kamil. "Ocular Disorders among Schoolchildren in Khartoum State, Sudan." *Eastern Mediterranean health journal= La revue de sante de la Mediterranee orientale= al-Majallah al-sihhiyah li-sharq al-mutawassit* 19, no. 3 (2013): 282-288.
- Sapkota, Yuddha D, Bishwa Nath Adhikari, Gopal P Pokharel, Bimal K Poudyal and Leon B Ellwein. "The Prevalence of Visual Impairment in School Children of Upper-Middle Socioeconomic Status in Kathmandu." *Ophthalmic epidemiology* 15, no. 1 (2008): 17-23.
- Saw, Seang-Mei, Yiong-Huak Chan, Wan-Ling Wong, Anoop Shankar, Mya Sandar, Tin Aung, Donald T. H. Tan, Paul Mitchell and Tien Yin Wong. "Prevalence and Risk Factors for Refractive Errors in the Singapore Malay Eye Survey." *Ophthalmology* 115, no. 10 (2008): 1713-1719.



- Saw, Seang-Mei, Gus Gazzard, David Koh, Mohamed Farook, Daniel Widjaja, Jeanette Lee and Donald T. H. Tan. "Prevalence Rates of Refractive Errors in Sumatra, Indonesia." *Invest. Ophthalmol. Vis. Sci.* 43, no. 10 (2002): 3174-3180.
- Saw, Seang-Mei, Pik-Pin Goh, Angela Cheng, Anoop Shankar, Donald TH Tan and LB Ellwein. "Ethnicity-Specific Prevalences of Refractive Errors Vary in Asian Children in Neighbouring Malaysia and Singapore." *British journal of ophthalmology* 90, no. 10 (2006): 1230-1235.
- Sawada, Akira, Atsuo Tomidokoro, Makoto Araie, Aiko Iwase and Tetsuya Yamamoto. "Refractive Errors in an Elderly Japanese Population: The Tajimi Study." *Ophthalmology* 115, no. 2 (2008): 363-370. e3.
- Schellini, Silvana Artioli, Shane R Durkin, Erika Hoyama, Flavio Hirai, Ricardo Cordeiro, Robert J Casson, Dinesh Selva and Carlos Roberto Padovani. "Prevalence of Refractive Errors in a Brazilian Population: The Botucatu Eye Study." *Ophthalmic epidemiology* 16, no. 2 (2009): 90-97.
- Schimiti, R. B., Costa, V. P., Gregui, M. J. F., Kara-José, N. & Temporini, E. R. Prevalence of refractive errors and ocular disorders in preschool and school children of Ibiporã-PR, Brazil (1989 to 1996). *Arquivos brasileiros de oftalmologia* 64, 379-384 (2001).
- Shah, Shaheen P., Mohammad Z. Jadoon, Brendan Dineen, Rupert R. A. Bourne, Gordon J. Johnson, Clare E. Gilbert and Mohammad D. Khan. "Refractive Errors in the Adult Pakistani Population: The National Blindness and Visual Impairment Survey." *Ophthalmic Epidemiology* 15, no. 3 (2008): 183-190.
- Soler, M., R. G. Anera, J. J. Castro, R. Jimenez and J. R. Jimenez. "Prevalence of Refractive Errors in Children in Equatorial Guinea." *Optom Vis Sci* 92, no. 1 (2015): 53-8.
- Sounouvou, I, S Tchabi, C Doutetien, F Sonon, L Yehouessi and SK Bassabi. "[a Study of Refractive Errors in a Primary School in Cotonou, Benin]." *Journal francais d'ophtalmologie* 31, no. 8 (2008): 771-775.
- Sun, J., J. Zhou, P. Zhao, J. Lian, H. Zhu, Y. Zhou, Y. Sun, Y. Wang, L. Zhao, Y. Wei, L. Wang, B. Cun, S. Ge and X. Fan. "High Prevalence of Myopia and High Myopia in 5060 Chinese University Students in Shanghai." *Invest Ophthalmol Vis Sci* 53, no. 12 (2012): 7504-9.
- Tan, C. S. H., Y. H. Chan, T. Y. Wong, G. Gazzard, M. Niti, T. P. Ng and S. M. Saw. "Prevalence and Risk Factors for Refractive Errors and Ocular Biometry Parameters in an Elderly Asian Population: The Singapore Longitudinal Aging Study (Slas)." *Eye* 25, no. 10 (2011): 1294-1301.
- Tarczy-Hornoch, K., Ying-Lai, M. & Varma, R. Myopic refractive error in adult Latinos: the Los Angeles Latino eye study. *Investigative ophthalmology & visual science* 47, 1845-1852 (2006).
- The Eye Diseases Prevalence Working Group. The Prevalence of Refractive Errors Among Adults in the United States, Western Europe, and Australia. *Archives of Ophthalmology* 122, 495-505 (2004).
- Turacli, M., Aktan, S. & Duruk, K. Ophthalmic screening of school children in Ankara. *European Journal of Ophthalmology* 5, 181-186 (1995).
- Uzma, Nazia, B Santhosh Kumar, BM Khaja Mohinuddin Salar, Mohammed Atheshm Zafar and V Devender Reddy. "A Comparative Clinical Survey of the Prevalence of Refractive Errors and Eye Diseases in Urban and Rural School Children." *Canadian Journal of Ophthalmology/Journal Canadien d'Ophtalmologie* 44, no. 3 (2009): 328-333.

- Villarreal, Gerardo M, Josefin Ohlsson, Humberto Cavazos, Maths Abrahamsson and JESUS H MOHAMED. "Prevalence of Myopia among 12-to 13-Year-Old Schoolchildren in Northern Mexico." *Optometry & Vision Science* 80, no. 5 (2003): 369-373.
- Villarreal, M. G., Ohlsson, J., Abrahamsson, M., Sjöström, A. & Sjöstrand, J. Myopisation: the refractive tendency in teenagers. Prevalence of myopia among young teenagers in Sweden. *Acta ophthalmologica Scandinavica* 78, 177-181 (2000).
- Vitale, S, R D Sperduto and F L Ferris III. "Increased Prevalence of Myopia in the United States between 1971-1972 and 1999-2004." *Archives of Ophthalmology* 127, no. 12 (2009): 1632-1639.
- Wang, Qin, BE Klein, Ronald Klein and Scot E Moss. "Refractive Status in the Beaver Dam Eye Study." *Investigative ophthalmology & visual science* 35, no. 13 (1994): 4344-4347.
- Wang, T. J., T. H. Chiang, T. H. Wang, L. L. K. Lin and Y. F. Shih. "Changes of the Ocular Refraction among Freshmen in National Taiwan University between 1988 and 2005." *Eye* 23, no. 5 (2008): 1168-1169.
- Wedner, SH, DA Ross, J Todd, A Anemona, R Balira and A Foster. "Myopia in Secondary School Students in Mwanza City, Tanzania: The Need for a National Screening Programme." *British Journal of Ophthalmology* 86, no. 11 (2002): 1200-1206.
- Wensor, M., C. A. McCarty and H. R. Taylor. "Prevalence and Risk Factors of Myopia in Victoria, Australia." *Archives of Ophthalmology* 117, no. 5 (1999): 658-663.
- Wickremasinghe, Sanjeewa, Paul J. Foster, Davaatseren Uranchimeg, Pak Sang Lee, Joe G. Devereux, Poul Helge Alsbirk, David Machin, Gordon J. Johnson and Jamyanjav Baasanhu. "Ocular Biometry and Refraction in Mongolian Adults." *Investigative Ophthalmology & Visual Science* 45, no. 3 (2004): 776-783.
- Williams, K. M. *et al.* Prevalence of refractive error in Europe: the European Eye Epidemiology (E3) Consortium. *European journal of epidemiology* 30, 305-315 (2015).
- Wolfram, C., R. Hohn, U. Kottler, P. Wild, M. Blettner, J. Bühren, N. Pfeiffer and A. Mirshahi. "Prevalence of Refractive Errors in the European Adult Population: The Gutenberg Health Study (Ghs)." *Br J Ophthalmol*, (2014).
- Wong, Tien Yin, Paul J. Foster, Joscelyn Hee, Tze Pin Ng, James M. Tielsch, Sek Jin Chew, Gordon J. Johnson and Steve K. L. Seah. "Prevalence and Risk Factors for Refractive Errors in Adult Chinese in Singapore." *Invest. Ophthalmol. Vis. Sci.* 41, no. 9 (2000): 2486-2494.
- Wu, Suh-Yuh, Yun Joo Yoo, Barbara Nemesure, Anselm Hennis and M Cristina Leske. "Nine-Year Refractive Changes in the Barbados Eye Studies." *Investigative ophthalmology & visual science* 46, no. 11 (2005): 4032-4039.
- Xu, Liang, Jianjun Li, Tongtong Cui, Ailian Hu, Guizhi Fan, Rongxiu Zhang, Hua Yang, Baochen Sun and Jost B. Jonas. "Refractive Error in Urban and Rural Adult Chinese in Beijing." *Ophthalmology* 112, no. 10 (2005): 1676-1683.
- Yared, Assefa Wolde, Wasie Taye Belaynew, Shiferaw Destaye, Tsegaw Ayanaw and Eshete Zelalem. "Prevalence of Refractive Errors among School Children in Gondar Town, Northwest Ethiopia." *Middle East African journal of ophthalmology* 19, no. 4 (2012): 372.
- Yekta, Abbas Ali, Akbar Fotouhi, Mehdi Khabazkhoob, Hassan Hashemi, Hadi Ostadimoghaddam, Javad Heravian and Shiva Mehravaran. "The Prevalence of Refractive Errors and Its

- Determinants in the Elderly Population of Mashhad, Iran." *Ophthalmic epidemiology* 16, no. 3 (2009): 198-203.
- Yekta, AbbasAli, Akbar Fotouhi, Hassan Hashemi, Cirous Dehghani, Hadi Ostadimoghaddam, Javad Heravian, Akbar Derakhshan, Reihaneh Yekta, Mehdi Behnia and Mehdi Khabazkhoob. "Prevalence of Refractive Errors among Schoolchildren in Shiraz, Iran." *Clinical & experimental ophthalmology* 38, no. 3 (2010): 242-248.
- Yoo, YC, JM Kim, KH Park, CY Kim and TW Kim. "Refractive Errors in a Rural Korean Adult Population: The Namil Study." *Eye*, (2013).
- You, Qi Sheng, Li Juan Wu, Jia Li Duan, Yan Xia Luo, Li Juan Liu, Xia Li, Qi Gao, Wei Wang, Liang Xu, Jost B. Jonas and Xiu Hua Guo. "Prevalence of Myopia in School Children in Greater Beijing: The Beijing Childhood Eye Study." *Acta Ophthalmologica*, (2013): n/a-n/a.
- Zhao, Jialiang, Xiangjun Pan, Ruifang Sui, Sergio R. Munoz, Robert D. Sperduto and Leon B. Ellwein. "Refractive Error Study in Children: Results from Shunyi District, China." *American Journal of Ophthalmology* 129, no. 4 (2000): 427-435.
- Ziaei, H., M. Katibeh, R. Solaimanizad, S. Hosseini, H. R. Gilasi, F. Golbafian and M. A. Javadi. "Prevalence of Refractive Errors; the Yazd Eye Study." *J Ophthalmic Vis Res* 8, no. 3 (2013): 227-36.
